# Supplementary material
Source: publisher figshare collection journal article supplement (https://acs.figshare.com/ndownloader/files/9478498)
Supplement: Supplementary file 1 [file 9478498]

As separate file, we provide a **movie from X-ray computed microtomography** of Fe2O3_PE plates weathered for 328 h (NP-02W), 1288 h (NP-08W), 1944 h (NP-12W) and 2928 h (NP-18W). The 18 weeks samples were obtained by prolonging irradiation of 12 weeks samples for 6 weeks but the water spraying frequency was reduced to 20 minutes per week. 2D slices parallel to sample surface are scanned from above the surface to 35 µm deep into the sample. Both the density of cracks and their depth increase with the aging time. The movie can be downloaded directly from Dropbox here: <https://www.dropbox.com/sh/mdbbfhxcag964ly/AACKbT5TwKvCpf4c_uqE94zDa?dl=0>
